# Supplementary material for: Impairment of lipid homeostasis causes lysosomal accumulation of endogenous protein aggregates through ESCRT disruption
Source: eLife journal article supplement (doi:10.7554/elife.86194), 2023-05-12
Supplement: fig3-data1 [file elife-86194-fig3-data1-v1.pdf]

**Figure 3 – source data 2**

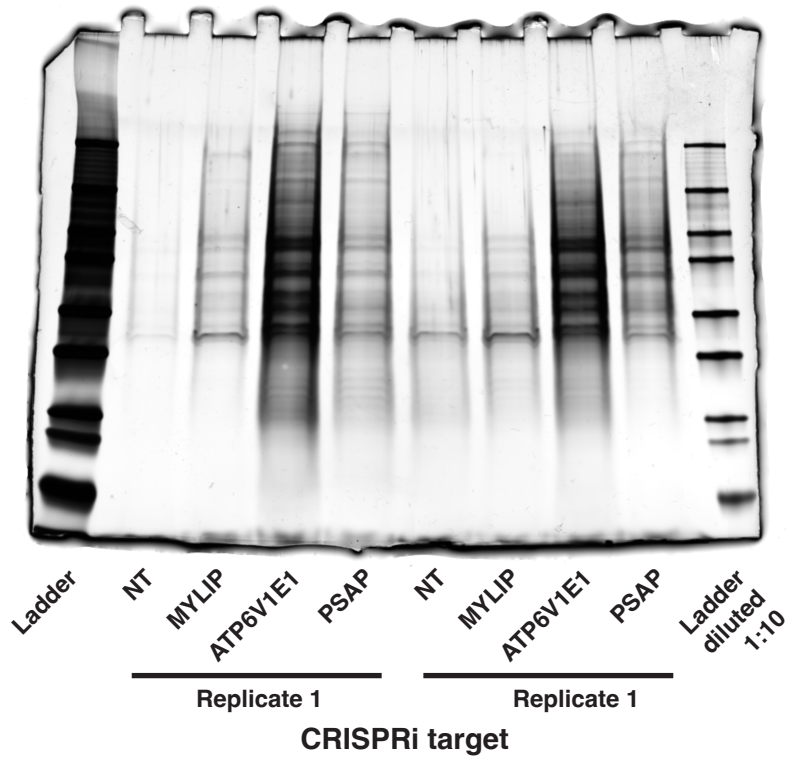

Ladder = BioRad Precision Plus Dual Color Protein Standards
