# Supplementary material for: Impairment of lipid homeostasis causes lysosomal accumulation of endogenous protein aggregates through ESCRT disruption
Source: eLife journal article supplement (doi:10.7554/elife.86194), 2023-05-12
Supplement: fig6-figsupp1-data1 [file elife-86194-fig6-figsupp1-data1-v1.pdf]

# Figure 6 – figure supplement 1 – source data 1

Blue epifluorescence signal of Me4BoVS labeling before cell lysis

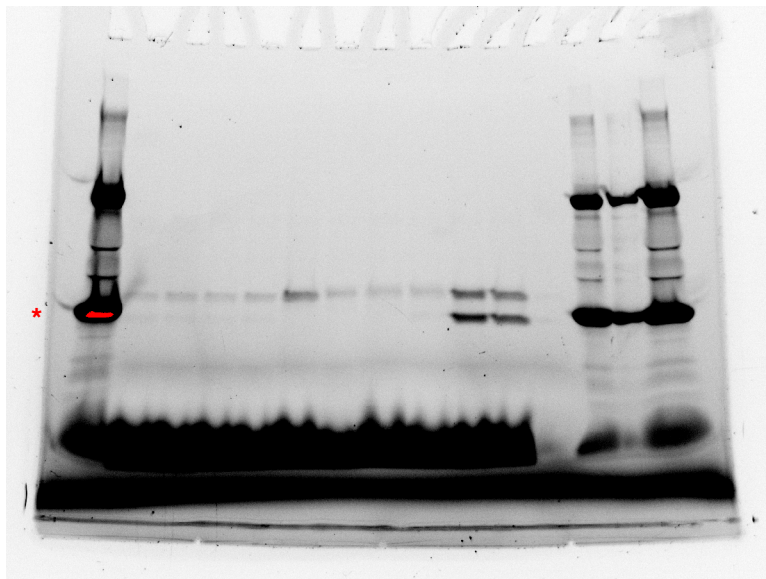

|        |           |     |     |     |                  |     |     |     |           |                         |           |                                  |
|--------|-----------|-----|-----|-----|------------------|-----|-----|-----|-----------|-------------------------|-----------|----------------------------------|
| Ladder | 20hr      | 4hr | 2hr | 1hr | 20hr             | 4hr | 2hr | 1hr | Untreated | MG132 only during lysis | Unlabeled | Ladder loaded at various amounts |
|        | MG132 1µM |     |     |     | Bortezomib 0.5µM |     |     |     |           |                         |           |                                  |

Ladder = BioRad Precision Plus Dual Color Protein Standards

\* indicates signal saturation
